# Supplementary material
Source: ML conference proceedings conference paper supplement (https://proceedings.mlr.press/v130/hong21a.html)
Supplement: Supplementary file 1 [file hong21a-supp.pdf]

## A Proofs for Offline Policy Optimization

Recall that we have a fixed latent sequence  $z_{1:T}$  such that for round  $t$ , latent state  $z_t$  parameterizes the underlying distribution of reward  $r_t \in [0, 1]$ . Also recall that we have IPS estimator  $\hat{V}$  given in (1), where the clipping parameter  $M$  can be ignored by only considering policies in  $\mathcal{H}$ . In this section, we denote by  $\tilde{V}$  the IPS estimator in (1) with the true latent states  $z_{1:T}$ . By Lemma 1, we know that  $\tilde{V}$  is unbiased.

Our first result bounds the discrepancy between the two IPS estimators  $\tilde{V}(\Pi)$  and  $\hat{V}(\Pi)$ :

**Lemma 4.** *For any  $\Pi \in \mathcal{H}^Z$  and  $\delta \in (0, 1]$ ,  $|\hat{V}(\Pi) - \tilde{V}(\Pi)| \leq M\varepsilon(T, \delta)$  holds with probability at least  $1 - \delta$ .*

*Proof.* The claim is proved as

$$|\hat{V}(\Pi) - \tilde{V}(\Pi)| = \left| \sum_{t=1}^T \frac{\pi_{\hat{z}_t}(a_t | x_t)}{p_t} r_t - \frac{\pi_{z_t}(a_t | x_t)}{p_t} r_t \right| \leq M \sum_{t=1}^T \mathbb{1}[\hat{z}_t \neq z_t] \leq M\varepsilon(T, \delta).$$

The first inequality is by assuming that  $\mathcal{H}$  in  $\mathcal{H}^Z$  satisfy (2). The second inequality is by Assumption 1 in Section 4 and holds with probability at least  $1 - \delta$ .  $\square$

Next, we bound the estimation error of  $\tilde{V}(\Pi)$  from  $V(\Pi)$ . This error is due to the randomness in  $\mathcal{D}$ .

**Lemma 5.** *For any  $\Pi \in \mathcal{H}^Z$ , logged data  $\mathcal{D}$ , and  $\delta \in (0, 1]$ ,  $|\tilde{V}(\Pi) - V(\Pi)| \leq M\sqrt{2T \log(2/\delta)}$  holds with probability at least  $1 - \delta$ .*

*Proof.* We define a martingale sequence  $(U_t)_{t \in [T] \cup \{0\}}$  over rounds  $t$  and then use Azuma's inequality. The sequence is defined as  $U_0 = 0$  and

$$U_t = U_{t-1} + \frac{\pi_{z_t}(a_t | x_t)}{p_t} r_t - V_t(\pi_{z_t})$$

for  $t > 0$ . It is easy to verify that this is a martingale. In particular, since  $z_t$  is fixed,

$$\mathbb{E}_{x_t, a_t, r_t \sim P_{z_t}, \pi_0} \left[ \frac{\pi_{z_t}(a_t | x_t)}{p_t} r_t - V_t(\pi_{z_t}) \mid U_0, \dots, U_{t-1} \right] = \mathbb{E}_{x_t, a_t, r_t \sim P_{z_t}, \pi_{z_t}} [r_t] - V_t(\pi_{z_t}) = 0,$$

and  $\mathbb{E}[U_t \mid U_0, \dots, U_{t-1}] = U_{t-1}$  for any round  $t$ . Also, since  $\Pi \in \mathcal{H}^Z$ , we have

$$\left| \frac{\pi_{z_t}(a_t | x_t)}{p_t} r_t - V_t(\pi_{z_t}) \right| \leq M.$$

Finally, by Azuma's inequality, we get

$$\mathbb{P} \left( |\tilde{V}(\Pi) - V(\Pi)| \geq M\sqrt{2T \log(2/\delta)} \right) = \mathbb{P} \left( |U_T - U_0| \geq M\sqrt{2T \log(2/\delta)} \right) \leq 2 \exp \left[ -\frac{4M^2T \log(2/\delta)}{2M^2T} \right] \leq \delta.$$

This concludes the proof.  $\square$

Using Lemmas 4 and 5 above, we can derive the results stated in the main paper.

**Lemma 2.** *For any policy  $\Pi \in \mathcal{H}^Z$ , its IPS estimate  $\hat{V}(\Pi)$  in (1), and true value  $V(\Pi)$ , we have that*

$$|V(\Pi) - \hat{V}(\Pi)| \leq M\varepsilon(T, \delta_1/2) + M\sqrt{2T \log(4/\delta_2)}$$

*holds with probability at least  $1 - \delta_1 - \delta_2$ .*

*Proof.* We have

$$|\hat{V}(\Pi) - V(\Pi)| \leq |\hat{V}(\Pi) - \tilde{V}(\Pi)| + |\tilde{V}(\Pi) - V(\Pi)|$$

from the triangle inequality. The result follows from Lemma 4 and Lemma 5.  $\square$

**Theorem 2.** *Let*

$$\hat{\Pi} = \arg \max_{\Pi \in \mathcal{H}^Z} \hat{V}(\Pi), \quad \Pi^* = \arg \max_{\Pi \in \mathcal{H}^Z} V(\Pi)$$

*be the optimal latent policies w.r.t. the off-policy estimated value and the true value respectively. Then for any  $\delta_1, \delta_2 \in (0, 1]$ , we have that*

$$V(\hat{\Pi}) \geq V(\Pi^*) - 2M\varepsilon(T, \delta_1/2) - 2M\sqrt{2T \log(4/\delta_2)}$$

*holds with probability at least  $1 - \delta_1 - \delta_2$ .*

*Proof.* We have

$$V(\Pi^*) - V(\hat{\Pi}) = [V(\Pi^*) - \hat{V}(\hat{\Pi})] + [\hat{V}(\hat{\Pi}) - V(\hat{\Pi})] \leq [V(\Pi^*) - \hat{V}(\Pi^*)] + [\hat{V}(\hat{\Pi}) - V(\hat{\Pi})],$$

where the inequality is from  $\hat{\Pi}$  maximizing  $\hat{V}$ . By Lemma 2, we have for any  $\Pi \in \mathcal{H}^Z$  that

$$|\hat{V}(\Pi) - V(\Pi)| \leq M\varepsilon(T, \delta_1/2) + 2M\sqrt{T \log(4/\delta_2)}$$

holds with probability at least  $1 - \delta_1/2 - \delta_2/2$ . We apply the lemma to both  $\hat{\Pi}$  and  $\Pi^*$ , and get the desired result.  $\square$

## B Proofs for Change-Point Detector

Recall that  $S$  is the number of stationary segments, and  $\tau_0 = 1 < \tau_1 < \dots < \tau_{S-1} < T = \tau_S$  are the change-points. Also recall that we have change-point detector given by Algorithm 1 that on a high-level, computes differences in total reward across sliding windows of length  $w$  and detects a change-point if a difference exceeds threshold  $c$ . For any  $i \in [S - 1]$ , let  $W_i = [\tau_i - w, \tau_i + w]$  be  $w$ -close rounds to change-point  $\tau_i$ . We also define  $W = \bigcup_i W_i$  as all rounds  $w$ -close to any change-point.

First, we bound the probability of false positives, or that we declare any round  $t \notin W$  as a change-point:

**Lemma 6.** *For any round  $t \notin W$ , the probability of a false detection is bounded from above as*

$$\mathbb{P}(|\mu_t^- - \mu_t^+| \geq c) \leq 4 \exp\left[-\frac{wc^2}{2}\right].$$

*Proof.* Since  $t \notin \bigcup_i W_i$ , we have  $\mathbb{E}[\mu_t^-] = \mathbb{E}[\mu_t^+]$ . By Hoeffding's inequality, we get

$$\mathbb{P}(|\mu_t^- - \mu_t^+| \geq c) \leq \mathbb{P}(|\mu_t^- - \mathbb{E}[\mu_t^-]| \geq c/2) + \mathbb{P}(|\mu_t^+ - \mathbb{E}[\mu_t^+]| \geq c/2) \leq \exp\left[-\frac{wc^2}{2}\right].$$

This concludes the proof.  $\square$

Next we bound the probability of failing to detect a change-point in  $W$ :

**Lemma 7.** *For any positive  $c \leq \Delta/2$  and  $W_i$ , a change-point is not detected in  $W_i$  with probability at most*

$$\mathbb{P}(\forall t \in W_i : |\mu_t^- - \mu_t^+| \leq c) \leq 4 \exp\left[-\frac{wc^2}{2}\right].$$

*Proof.* Fix  $s = \tau_i$ . From  $s \in W_i$ , we have

$$\begin{aligned} \mathbb{P}(\forall t \in W_i : |\mu_t^- - \mu_t^+| \leq c) &= 1 - \mathbb{P}(\exists t \in W_i : |\mu_t^- - \mu_t^+| > c) \leq 1 - \mathbb{P}(|\mu_s^- - \mu_s^+| > c) \\ &= \mathbb{P}(|\mu_s^- - \mu_s^+| \leq c). \end{aligned}$$

Note that  $|\mu_s^- - \mu_s^+| \leq c$  implies that either  $\mu_s^-$  or  $\mu_s^+$  is not close to its mean. More specifically, since  $\mathbb{E}[\mu_s^-] = V_{s-1}(\pi_0)$ ,  $\mathbb{E}[\mu_s^+] = V_s(\pi_0)$ , and  $|V_s(\pi_0) - V_{s-1}(\pi_0)| \geq \Delta$ , we have

$$\mathbb{P}(|\mu_s^- - \mu_s^+| \leq c) \leq \mathbb{P}\left(|\mu_s^- - \mathbb{E}[\mu_s^-]| \geq \frac{\Delta - c}{2}\right) + \mathbb{P}\left(|\mu_s^+ - \mathbb{E}[\mu_s^+]| \geq \frac{\Delta - c}{2}\right).$$

From  $2c \leq \Delta$  and by Hoeffding's inequality, the first term is bounded as

$$\mathbb{P}\left(|\mu_s^- - \mathbb{E}[\mu_s^-]| \geq \frac{\Delta - c}{2}\right) \leq \mathbb{P}\left(|\mu_s^- - \mathbb{E}[\mu_s^-]| \geq c/2\right) \leq 2 \exp\left[-\frac{wc^2}{2}\right].$$

The second term is bounded analogously. Finally, we chain all inequalities and get our claim.  $\square$

Finally, we prove Theorem 1 by applying Lemma 6 to all rounds  $t \notin W$ , Lemma 7 to all change-points, and then chaining them by the union bound.

**Theorem 1.** *Let  $\tau_i - \tau_{i-1} > 4w$  for all  $i \in [L]$ . For any  $\delta \in (0, 1]$ , and  $c$  and  $w$  in Algorithm 1 such that*

$$\Delta/2 \geq c \geq \sqrt{2 \log(8T/\delta)/w},$$

*then Algorithm 1 estimates  $\hat{z}_{1:T}$  so  $\sum_{t=1}^T \mathbb{1}[\hat{z}_t \neq z_t] \leq Sw$  holds with probability at least  $1 - \delta$ .*

*Proof.* Define  $\delta \in (0, 1]$ . We see that given  $w$ , setting  $c$  as described satisfies,

$$4T \exp\left[\frac{-wc^2}{2}\right], \quad 4k \exp\left[\frac{-wc^2}{2}\right] \leq \frac{\delta}{2}.$$

We know that  $\varepsilon(T, \delta) = kw$  when all the estimated changepoints are in  $W$  (at most  $w$  rounds from a true change-point), and every  $W_i \in W$  contains exactly one estimated change-point. This cannot happen if (1) a change-point is falsely detected outside  $W$ , and (2), no change-point is detected in some  $W_i \in W$ .

We can bound from above the probability of any error occurring with the union bound. Proposition 3 applied to every round upper-bounds the probability of (1) by  $4T \exp(-wc^2/2)$ . Meanwhile, Proposition 4 applied to every change-point upper-bounds the probability of (2) by  $4k \exp(-wc^2/2)$ . From Algorithm 1, we remove a  $4w$ -window around each detected changepoint, and under the assumption that  $\tau_i - \tau_{i-1} > 4w$  for all  $i \in [k]$ , we guarantee that exactly one changepoint is detected in each  $W_i$  for true changepoint  $\tau_i$ . Combining yields the total probability of an error,

$$4T \exp\left[\frac{-wc^2}{2}\right] + 4k \exp\left[\frac{-wc^2}{2}\right] \leq \delta,$$

which is the desired result.  $\square$

## C Proofs for Online Deployment

Recall that we have a mixture-of-experts algorithm  $\mathcal{E}$  and experts/sub-policies  $\hat{\Pi} = (\hat{\pi})_{z \in \mathcal{Z}}$ , such that for each round  $t$ , actions are sampled according to  $a_t \sim \mathcal{E}_t(x_t, \hat{\pi})$ . Let  $\mathcal{E}$  be Exp4.S as described in Algorithm 6; this is similar to one

proposed in Luo et al. (2018), but for stochastic experts.

---

**Algorithm 6:** Exp4.S
 

---

**Input:** vector of expert sub-policies  $\hat{\Pi} = (\hat{\pi}_z)_{z \in \mathcal{Z}}$  with  $|\mathcal{Z}| = L$ , and hyperparameters  $\beta, \eta > 0, \gamma \in (0, 1]$

Initialize  $w_1 = (1/L, \dots, 1/L) \in [0, 1]^L$ .

**for**  $t \leftarrow 1, 2, \dots, T$  **do**

Observe  $x_t$ , and expert feedback  $\hat{\pi}_z(\cdot | x_t), \forall z \in \mathcal{Z}$ .

Choose  $a_t \sim \mathcal{E}_t$ , where for each  $a \in \mathcal{A}$ ,

$$\mathcal{E}_t(a) = (1 - \gamma) \sum_{z \in \mathcal{Z}} w_t(z) \hat{\pi}_z(a | x_t) + \frac{\gamma}{L}.$$

Observe  $r_t$ . Estimate the action costs under full feedback  $\hat{c}_t(a) = \mathbb{1}[a_t = a] \frac{1-r_t}{\hat{\mathcal{E}}_t(a)}, \forall a \in \mathcal{A}$ .

Propagate the cost to the experts  $\tilde{c}_t(z) = \hat{c}_t(a_t) \hat{\pi}_z(a_t | x_t), \forall z \in \mathcal{Z}$ .

Update the distribution weights,  $\tilde{w}_{t+1}(z) \propto w_t(z) \exp(-\eta \tilde{c}_t(z)), \forall z \in \mathcal{Z}$ .

Mix with uniform weights,  $w_{t+1}(z) = (1 - \beta)w_t(z) + \beta, \forall z \in \mathcal{Z}$ .

**end**

---

Our first result is the following regret guarantee over any stationary segment. A version of this proof for deterministic experts is in Theorem 2 of Luo et al. (2018).

**Lemma 8.** *Let  $\mathcal{E}$  be Exp4.S as in Algorithm 6. Also, let  $\gamma = 0, \eta = \sqrt{\log(L)/(\ell K)}$ , and  $\beta = 1/L$ . Then, for any stationary segment  $[\tau_{s-1}, \tau_s - 1]$  of length at most  $\ell$ , any history up to  $\tau_{s-1}$ , and any latent state  $z \in \mathcal{Z}$ , the regret is bounded as*

$$\sum_{t=\tau_{s-1}}^{\tau_s-1} \mathbb{E}_{z_t, \hat{\pi}_z} [r_t] - \mathbb{E}_{z_t, \mathcal{E}_t} [r_t] \leq \sqrt{2\ell K \log(L)}.$$

*Proof.* First, we have the following upper-bound,

$$\begin{aligned} \log \left[ \sum_{z' \in \mathcal{Z}} w_t(z') \exp(-\eta \tilde{c}_t(z')) \right] &\leq \log \left[ \sum_{z' \in \mathcal{Z}} w_t(z') (1 - \eta \tilde{c}_t(z') + \eta^2 \tilde{c}_t(z')^2) \right] \\ &\leq -\eta \sum_{z' \in \mathcal{Z}} w_t(z') \tilde{c}_t(z') + \eta^2 \sum_{z' \in \mathcal{Z}} w_t(z') \tilde{c}_t(z')^2, \end{aligned}$$

where we use that  $\exp(-x) \leq 1 - x + x^2$ , and  $\log(1 + x) \leq x$  for all  $x \geq 0$ . Meanwhile, for any  $z \in \mathcal{Z}$ , we can also bound the same quantity from below,

$$\begin{aligned} \log \left[ \sum_{z' \in \mathcal{Z}} w_t(z') \exp(-\eta \tilde{c}_t(z')) \right] &= \log \left[ \frac{w_t(z) \exp(-\eta \tilde{c}_t(z))}{\tilde{w}_{t+1}(z)} \right] = \log \left[ \frac{w_t(z)(1 - \beta)}{w_{t+1}(z) - \beta} \right] - \eta \tilde{c}_t(z) \\ &\geq \log \left[ \frac{w_t(z)}{w_{t+1}(z)} \right] - 2\beta - \eta \tilde{c}_t(z), \end{aligned}$$

where for the last inequality, we use that  $\log(1 - \beta) \geq -\beta/(1 - \beta) \geq -2\beta$ . Combining the two inequalities, summing over all  $t \in [\tau_{s-1}, \tau_s - 1]$ , and telescoping yields,

$$\begin{aligned} \sum_{t=\tau_{s-1}}^{\tau_s-1} \sum_{z' \in \mathcal{Z}} w_t(z') \tilde{c}_t(z') - \tilde{c}_t(z) &\leq \frac{1}{\eta} \log \left[ \frac{w_{\tau_s}(z)}{w_{\tau_{s-1}}(z)} \right] + \frac{2\beta\ell}{\eta} + \eta \sum_{t=\tau_{s-1}}^{\tau_s-1} \sum_{z' \in \mathcal{Z}} w_t(z') \tilde{c}_t(z')^2 \\ &\leq \frac{\log(1/\beta) + 2\beta\ell}{\eta} + \eta \sum_{t=\tau_{s-1}}^{\tau_s-1} \sum_{z' \in \mathcal{Z}} w_t(z') \tilde{c}_t(z')^2, \end{aligned}$$

where we use that  $w_t(z) \in [\beta, 1]$  for all rounds  $t$ .

When  $\gamma = 0$  we know that  $\hat{c}_t(a_t)$  is unbiased, or  $\mathbb{E}_{z_t, \mathcal{E}_t} [\hat{c}_t(a_t)] = 1 - \mathbb{E}_{z_t, \mathcal{E}_t} [r_t]$ . We also have that for any  $z' \in \mathcal{Z}$ ,

$$\mathbb{E}_{z_t, \mathcal{E}_t} [\tilde{c}_t(z')] = \mathbb{E}_{z_t, \mathcal{E}_t} \left[ \sum_{a \in \mathcal{A}} \hat{\pi}_{z'}(a | x_t) \hat{c}_t(a) \right] = 1 - \mathbb{E}_{z_t, \hat{\pi}_z} [r_t].$$

Taking the expectation of both sides leads to,

$$\sum_{t=\tau_{s-1}}^{\tau_s-1} \mathbb{E}_{z_t, \hat{\pi}_z} [r_t] - \mathbb{E}_{z_t, \mathcal{E}_t} [r_t] \leq \frac{\log(1/\beta) + 2\beta\ell}{\eta} + \eta \sum_{t=\tau_{s-1}}^{\tau_s-1} \sum_{z' \in \mathcal{Z}} \mathbb{E}_{z_t, \mathcal{E}_t} [w_t(z') \tilde{c}_t(z')^2].$$

Next, we have that for any  $z' \in \mathcal{Z}$ ,

$$\mathbb{E}_{z_t, \mathcal{E}_t} [\tilde{c}_t(z')^2] = \mathbb{E}_{z_t, \mathcal{E}_t} \left[ \left( \frac{\hat{\pi}_{z'}(a_t | x_t)(1 - r_t)}{\mathcal{E}_t(a_t)} \right)^2 \right] \leq \sum_{a \in \mathcal{A}} \frac{\hat{\pi}_{z'}(a | x_t)}{\mathcal{E}_t(a)},$$

where we use that  $a_t \sim \mathcal{E}_t$  and  $r_t \in [0, 1]$ . Substituting this result yields,

$$\sum_{z' \in \mathcal{Z}} \mathbb{E}_{z_t, \mathcal{E}_t} [w_t(z') \tilde{c}_t(z')^2] \leq \sum_{a \in \mathcal{A}} \mathbb{E}_{z_t, \mathcal{E}_t} \left[ \frac{1}{\mathcal{E}_t(a)} \sum_{z' \in \mathcal{Z}} w_t(z') \pi_{z'}(a_t | x_t) \right] \leq K,$$

where we again use that  $a_t \sim \mathcal{E}_t$ . Substituting into the regret bound and using the values for  $\eta, \beta$  yields

$$\sum_{t=\tau_{s-1}}^{\tau_s-1} \mathbb{E}_{z_t, \hat{\pi}_z} [r_t] - \mathbb{E}_{z_t, \mathcal{E}_t} [r_t] \leq \frac{\log(1/\beta) + 2\beta\ell}{\eta} + \eta K \ell \leq \sqrt{2\ell K \log(L)},$$

as desired.  $\square$

In practice, we do not know the lengths of stationary segments, and may not be able to find a tight upper-bound  $\ell$  on the lengths of stationary segments. However, in our analysis, we can further partition stationary segments so that they do not exceed length  $\ell$  at the cost of increasing the number of change-points. This is formalized in the following corollary.

**Lemma 9.** *Let  $\mathcal{E}$  be Exp4.S as in Algorithm 6. Also, let  $\gamma = 0, \eta = \sqrt{\log(L)/(\ell K)}$ , and  $\beta = 1/L$ . Then, the total regret is bounded by*

$$\sum_{s=1}^S \max_{z \in \mathcal{Z}} \sum_{t=\tau_{s-1}}^{\tau_s-1} \mathbb{E}_{z_t, \hat{\pi}_z} [r_t] - \sum_{t=1}^T \mathbb{E}_{z_t, \mathcal{E}_t} [r_t] \leq \left( T/\sqrt{\ell} + S\sqrt{\ell} \right) \sqrt{2K \log(L)}.$$

*Proof.* Recall that  $S$  is the number of stationary segments within the  $T$  rounds, as defined in Section 3. Our goal is to divide the  $T$  rounds into stationary intervals of length at most  $\ell$ , so that we can apply Lemma 8 on each interval. We do this as follows. First, we construct  $T/\ell$  intervals of length at most  $T$ . Then, we additionally divide intervals that contain changepoints, so that each interval contains only a single latent state. This leads to at most  $T/\ell + S$  stationary intervals. Finally, using Lemma 8 on each interval and summing the regrets the desired result. Note that though we consider  $T/\ell + S$  intervals, we only need to consider the best latent sub-policy for each of  $S$  stationary segments, as intervals belonging to the same stationary segment have the same optimal sub-policy.  $\square$

**Lemma 3.** *The regret  $\mathcal{R}(T; \mathcal{E}, \hat{\Pi})$  is bounded from above as*

$$\begin{aligned} \mathcal{R}(T; \mathcal{E}, \hat{\Pi}) &\leq \left[ \sum_{t=1}^T \mathbb{E}_{z_t, \pi_{z_t}^*} [r_t] - \sum_{t=1}^T \mathbb{E}_{z_t, \hat{\pi}_{z_t}} [r_t] \right] \\ &\quad + \left[ \sum_{s=1}^S \max_{z \in \mathcal{Z}} \sum_{t=\tau_{s-1}}^{\tau_s-1} \mathbb{E}_{z_t, \hat{\pi}_z} [r_t] - \sum_{t=1}^T \mathbb{E}_{z_t, \mathcal{E}_t} [r_t] \right]. \end{aligned} \quad (4)$$

*Proof.* The regret can be decomposed as follows:

$$\begin{aligned} \mathcal{R}(T; \mathcal{E}, \hat{\Pi}) &= \sum_{t=1}^T \mathbb{E}_{z_t, \pi_{z_t}^*} [r_t] - \sum_{t=1}^T \mathbb{E}_{z_t, \mathcal{E}_t} [r_t] \\ &= \left[ \sum_{t=1}^T \mathbb{E}_{z_t, \pi_{z_t}^*} [r_t] - \sum_{t=1}^T \mathbb{E}_{z_t, \hat{\pi}_{z_t}} [r_t] \right] + \left[ \sum_{t=1}^T \mathbb{E}_{z_t, \hat{\pi}_{z_t}} [r_t] - \sum_{t=1}^T \mathbb{E}_{z_t, \mathcal{E}_t} [r_t] \right], \end{aligned}$$

where we introduce  $\hat{\Pi}$  that acts according to the true latent state. Then, recalling there are  $S$  stationary segments, the above expression can be further expressed as

$$\begin{aligned} & \left[ \sum_{t=1}^T \mathbb{E}_{z_t, \pi_{z_t}^*} [r_t] - \sum_{t=1}^T \mathbb{E}_{z_t, \hat{\pi}_{z_t}} [r_t] \right] + \left[ \sum_{s=1}^S \sum_{t=\tau_{s-1}}^{\tau_s-1} \mathbb{E}_{z_t, \hat{\pi}_{z_t}} [r_t] - \sum_{t=1}^T \mathbb{E}_{z_t, \mathcal{E}_t} [r_t] \right] \\ & \leq \left[ \sum_{t=1}^T \mathbb{E}_{z_t, \pi_{z_t}^*} [r_t] - \sum_{t=1}^T \mathbb{E}_{z_t, \hat{\pi}_{z_t}} [r_t] \right] + \left[ \sum_{s=1}^S \max_{z \in \mathcal{Z}} \sum_{t=\tau_{s-1}}^{\tau_s-1} \mathbb{E}_{z_t, \hat{\pi}_z} [r_t] - \sum_{t=1}^T \mathbb{E}_{z_t, \mathcal{E}_t} [r_t] \right], \end{aligned}$$

where we utilize the fact that each stationary segment has one optimal sub-policy.  $\square$

**Theorem 3.** Let  $\hat{\Pi}$  be defined as in Theorem 2 and  $\mathcal{E}$  be Exp4.S Algorithm 6. Let  $z_{1:T}$  be the same latent states as in offline data  $\mathcal{D}$  and  $S$  be the number of stationary segments. Then for any  $\delta_1, \delta_2 \in (0, 1]$ , we have that

$$\begin{aligned} \mathcal{R}(T; \mathcal{E}, \hat{\Pi}) & \leq \\ & 2M\varepsilon(T, \delta_1/2) + 2M\sqrt{2T \log(4/\delta_2)} + 2\sqrt{STK \log L} \end{aligned}$$

holds with probability at least  $1 - \delta_1 - \delta_2$ .

*Proof.* We have the following regret decomposition due to Lemma 3,

$$\mathcal{R}(T; \mathcal{E}, \hat{\Pi}) \leq \left[ \sum_{t=1}^T \mathbb{E}_{z_t, \pi_{z_t}^*} [r_t] - \sum_{t=1}^T \mathbb{E}_{z_t, \hat{\pi}_{z_t}} [r_t] \right] + \left[ \sum_{s=1}^S \max_{z \in \mathcal{Z}} \sum_{t=\tau_{s-1}}^{\tau_s-1} \mathbb{E}_{z_t, \hat{\pi}_z} [r_t] - \sum_{t=1}^T \mathbb{E}_{z_t, \mathcal{E}_t} [r_t] \right].$$

The first term can be bounded using our offline analysis, which shows near-optimality of  $\hat{\Pi}$  when the latent state is known. In the case where  $z_{1:T}$  is the same both offline and online, we see that for each round  $t$ ,  $\mathbb{E}_{z_t, \pi_{z_t}^*} [r_t] - \mathbb{E}_{z_t, \hat{\pi}_{z_t}} [r_t] = V_t(\pi_{z_t}^*) - V_t(\hat{\pi}_{z_t})$ . Hence, the first term is exactly  $V(\Pi^*) - V(\hat{\Pi})$  and is bounded by Theorem 2 w.p. at least  $1 - \delta_1 - \delta_2$ . The second term is the switching regret of Exp4.S, and is bounded by choosing  $\ell = T/S$  in Lemma 9. Combining the two bounds yields the desired result.  $\square$
